# Supplementary material for: The interconversion between THF·B3H7 and B3H8−: an efficient synthetic method for MB3H8 (M = Li and Na)
Source: Royal Society of Chemistry journal article supplement (doi:10.1039/c9dt00843h), 2019-01-01
Supplement: c9dt00843h1.pdf [file c9dt00843h1.pdf]

## Supporting Information

### **The interconversion between THF·B<sub>3</sub>H<sub>7</sub> and B<sub>3</sub>H<sub>8</sub><sup>−</sup>: an efficient synthetic method for MB<sub>3</sub>H<sub>8</sub> (M = Li and Na)**

Xin-Ran Liu,<sup>a</sup> Xi-Meng Chen,<sup>a</sup> Jie Zhang,<sup>a</sup> Torben R. Jensen<sup>\*c</sup> and Xuenian Chen<sup>\*a,b</sup>

<sup>a</sup> *Henan Key Laboratory of Boron Chemistry and Advanced Energy Materials, School of Chemistry and Chemical Engineering, Henan Normal University, Xinxiang, Henan 453007, China.*

<sup>b</sup> *College of Chemistry and Molecular Engineering, Zhengzhou University, Zhengzhou, Henan 450001, China.*

<sup>c</sup> *Center for Materials Crystallography (CMC) at the Department of Chemistry and the Interdisciplinary Nanoscience Center (iNANO), Aarhus University, Langelandsgade 140, 8000 Aarhus, Denmark.*

*E-mails: [xnchen@htu.edu.cn](mailto:xnchen@htu.edu.cn) (X.C.); [trj@chem.au.dk](mailto:trj@chem.au.dk) (T.R.J.)*

## Table of Contents:

|                                                                                                                                                                         |     |
|-------------------------------------------------------------------------------------------------------------------------------------------------------------------------|-----|
| 1. Experimental Section:.....                                                                                                                                           | S3  |
| 1.1. General Remarks.....                                                                                                                                               | S3  |
| 1.2. Reaction of $\text{KB}_3\text{H}_8$ with $\text{HCl}$ . ....                                                                                                       | S3  |
| 1.3. Reaction of $\text{THF} \cdot \text{B}_3\text{H}_7$ with $\text{LiNH}_2\text{BH}_3$ .....                                                                          | S3  |
| 1.4 Reaction of $\text{THF} \cdot \text{B}_3\text{H}_7$ with $\text{NaNH}_2\text{BH}_3$ .....                                                                           | S4  |
| 1.5. Reaction of $\text{THF} \cdot \text{B}_3\text{H}_7$ with $\text{LiBH}_4$ . ....                                                                                    | S4  |
| 1.6. Reaction of $\text{THF} \cdot \text{B}_3\text{H}_7$ with $\text{NaBH}_4$ .....                                                                                     | S4  |
| 1.7. Synthesis of $\text{NH}_4\text{B}_3\text{H}_8$ . ....                                                                                                              | S5  |
| 1.8. Synthesis of $\text{NBu}_4\text{B}_3\text{H}_8$ . ....                                                                                                             | S5  |
| 2. Supporting Results:.....                                                                                                                                             | S6  |
| Fig. S1 X-ray powder diffraction data of $\text{KCl}$ . ....                                                                                                            | S6  |
| Fig. S2 X-ray powder diffraction data of the formed $[\text{NH}_2\text{BH}_2]_n$ .....                                                                                  | S6  |
| Fig. S3 IR spectrum of the formed $[\text{NH}_2\text{BH}_2]_n$ . ....                                                                                                   | S7  |
| Fig. S4 $^{11}\text{B}$ NMR spectrum of the prepared $\text{Li}(\text{THF})_{1.5}\text{B}_3\text{H}_8$ in $\text{CD}_3\text{CN}$ . ....                                 | S7  |
| Fig. S5 $^1\text{H}$ spectrum of the prepared $\text{Li}(\text{THF})_{1.5}\text{B}_3\text{H}_8$ in $\text{CD}_3\text{CN}$ .....                                         | S8  |
| Fig. S6 $^1\text{H}\{^{11}\text{B}\}$ spectrum of the prepared $\text{Li}(\text{THF})_{1.5}\text{B}_3\text{H}_8$ in $\text{CD}_3\text{CN}$ .....                        | S8  |
| Fig. S7 $^{11}\text{B}$ NMR spectrum of the prepared unsolvated $\text{NaB}_3\text{H}_8$ in $\text{CD}_3\text{CN}$ . ....                                               | S9  |
| Fig. S8 $^1\text{H}$ NMR spectrum of the prepared unsolvated $\text{NaB}_3\text{H}_8$ in $\text{CD}_3\text{CN}$ .....                                                   | S9  |
| Fig. S9 $^{11}\text{B}$ NMR spectrum of the reaction solution of $\text{LiBH}_4$ and $\text{THF} \cdot \text{B}_3\text{H}_7$ in $\text{THF}$ at room temperature. ....  | S10 |
| Fig. S10 $^{11}\text{B}$ NMR spectrum of the prepared $\text{Li}(\text{THF})_{1.5}\text{B}_3\text{H}_8$ in $\text{CD}_3\text{CN}$ . ....                                | S10 |
| Fig. S11 $^1\text{H}$ NMR spectrum of the prepared $\text{Li}(\text{THF})_{1.5}\text{B}_3\text{H}_8$ in $\text{CD}_3\text{CN}$ . ....                                   | S11 |
| Fig. S12 $^{11}\text{B}$ NMR spectrum of the reaction solution of $\text{NaBH}_4$ and $\text{THF} \cdot \text{B}_3\text{H}_7$ in $\text{THF}$ at room temperature. .... | S11 |
| Fig. S13 X-ray powder diffraction data of the formed $\text{KCl}$ . ....                                                                                                | S12 |
| Fig. S14 $^{11}\text{B}$ NMR spectrum of the prepared $\text{NH}_4\text{B}_3\text{H}_8$ in $\text{CD}_3\text{CN}$ . ....                                                | S12 |
| Fig. S15 $^1\text{H}$ NMR spectrum of the prepared $\text{NH}_4\text{B}_3\text{H}_8$ in $\text{CD}_3\text{CN}$ . ....                                                   | S13 |
| Fig. S16 X-ray powder diffraction data of the formed $\text{KBr}$ .....                                                                                                 | S13 |
| Fig. S17 $^{11}\text{B}$ NMR spectrum of the prepared $\text{NBu}_4\text{B}_3\text{H}_8$ in $\text{CD}_3\text{CN}$ .....                                                | S14 |
| Fig. S18 $^1\text{H}$ NMR spectrum of the prepared $\text{NBu}_4\text{B}_3\text{H}_8$ in $\text{CD}_3\text{CN}$ .....                                                   | S14 |

|                                                                                                        |     |
|--------------------------------------------------------------------------------------------------------|-----|
| 3. Supporting Scheme: .....                                                                            | S15 |
| Scheme S1 The reaction of MBH <sub>4</sub> (M = Li, Na) with THF·B <sub>3</sub> H <sub>7</sub> . ..... | S15 |
| 4. References: .....                                                                                   | S15 |

## 1. Experimental Section:

### 1.1. General Remarks.

All manipulations were carried out on a Schlenk line or in a glovebox filled with high purity nitrogen. The  $^{11}\text{B}$  NMR spectra were recorded using either a 128 MHz or a 193 MHz spectrometer and externally referenced to  $\text{BF}_3\cdot\text{OEt}_2$  in  $\text{C}_6\text{D}_6$  ( $\delta = 0.00$  ppm). The  $^1\text{H}$  NMR spectra were recorded using either a 400 MHz or a 600 MHz spectrometer. X-ray diffraction (XRD) data were obtained with a Rigaku D/max 2500 diffractometer using  $\text{Cu/K}\alpha$  radiation,  $\lambda = 0.1542$  nm, 40 kV, 100 mA. IR spectra were measured by a Spectrum 400F.

The  $\text{THF}\cdot\text{BH}_3$  tetrahydrofuran (THF) solution, HCl diethyl ether solution, and ammonia borane ( $\text{NH}_3\text{BH}_3$ ) were purchased from United Boron (Zhengzhou) Energy Materials S&T LLC and used as received. K, LiH, NaH,  $\text{LiBH}_4$ ,  $\text{NaBH}_4$ ,  $\text{NH}_4\text{Cl}$  and  $\text{N}(\text{C}_4\text{H}_9)_4\text{Br}$  were purchased from Sinopharm Chemical Reagents Co., Ltd.  $\text{NH}_4\text{Cl}$  was recrystallized from methanol and  $\text{NBu}_4\text{Br}$  was recrystallized from tetrahydrofuran (THF). Dichloromethane was dried over calcium hydride, THF and toluene were dried over sodium and freshly distilled prior to use.  $\text{LiNH}_2\text{BH}_3$  and  $\text{NaNH}_2\text{BH}_3$  were prepared according to the literature methods.<sup>S1</sup>

### 1.2. Reaction of $\text{KB}_3\text{H}_8$ with HCl.

A solution of  $\text{KB}_3\text{H}_8$  (0.40 g, 5 mmol) in 25 mL of THF was added to a 50 mL flask. A solution of 1 M HCl in diethyl ether (5 mL, 5 mmol) was added dropwisely to the flask at room temperature and stirred for 20 min. After KCl was filtered (Fig. S1), the solution of  $\text{THF}\cdot\text{B}_3\text{H}_7$  was obtained.  $^{11}\text{B}$  NMR (128 MHz, THF):  $\delta$  -8.23 (*br*, 2B of  $\text{BHB}$ ), -12.99 (*br*,  $\text{BH}_2$ ) ppm (Fig. 1).

In another batch of reaction,  $\text{KB}_3\text{H}_8$  (0.40 g, 5 mmol) was added to a 100 mL flask and then 25 mL of THF was condensed. A solution of 1 M HCl in diethyl ether (5 mL, 5 mmol) was added dropwisely to the flask at room temperature and stirred for 20 min. The  $^{11}\text{B}$  NMR showed the formation of  $\text{B}_3\text{H}_7$  (Fig. 2b). Then 5 mL, 10 mL, 15 mL of 1 M HCl diethyl ether solution was added dropwisely to above reaction mixture in turn. Reaction mixture was stirring for 20 min after each addition of HCl and then monitored by  $^{11}\text{B}$  NMR. The results are listed in Fig. 2c, d, and e.

### 1.3. Reaction of $\text{THF}\cdot\text{B}_3\text{H}_7$ with $\text{LiNH}_2\text{BH}_3$ .

A  $\text{THF}\cdot\text{B}_3\text{H}_7$  solution (30 mL, 5 mmol) and  $\text{LiNH}_2\text{BH}_3$  (0.19 g, 5 mmol) were added to a 50 mL flask. The mixture was stirred for 20 min at room temperature. The formed precipitate was filtered and dried under dynamic vacuum to give the  $[\text{NH}_2\text{BH}_2]_n$  white product, which was confirmed by XRD and IR (Figs. S2 and S3). Removal of THF from the filtrate under dynamic vacuum to give

Li(THF)<sub>1.5</sub>B<sub>3</sub>H<sub>8</sub> as a clear oily product (0.64 g, 82%). <sup>11</sup>B NMR (193 MHz, CD<sub>3</sub>CN): δ -30.8 (*nonet*, *J* = 33 Hz) ppm. <sup>1</sup>H NMR (600 MHz, CD<sub>3</sub>CN): δ 3.64 (*m*, 4α-H of THF), 1.79 (*m*, 4β-H of THF), 0.14 (*decet*, *J* = 33 Hz, 8H of B<sub>3</sub>H<sub>8</sub>) ppm. <sup>1</sup>H{<sup>11</sup>B} (600 MHz, CD<sub>3</sub>CN): δ 3.65 (*m*, 4α-H of THF), 1.80 (*m*, 4β-H of THF), 0.13 (*s*, 8H of B<sub>3</sub>H<sub>8</sub>) ppm (Figs. S4, S5 and S6). [NH<sub>2</sub>BH<sub>2</sub>]<sub>n</sub>: IR (cm<sup>-1</sup>): 3300 (*s*, *br*), 3248 (*w*), 2398 (*s*, *br*), 1560 (*s*), 1405 (*s*), 1209 (*s*, *br*), 1081 (*m*), 846 (*w*), 708 (*w*).

#### 1.4 Reaction of THF·B<sub>3</sub>H<sub>7</sub> with NaNH<sub>2</sub>BH<sub>3</sub>.

A THF·B<sub>3</sub>H<sub>7</sub> (30 mL, 5 mmol) solution and NaNH<sub>2</sub>BH<sub>3</sub> (0.27 g, 5 mmol) were added to a 50 mL flask. The reaction was stirred for 30 min at room temperature. The formed precipitate was filtered. Then THF in the filtrate was pumped to give an oily product, which was dissolved in 20 mL CH<sub>2</sub>Cl<sub>2</sub> and converted into suspension under stirring. After filtration, the solid was dried under dynamic vacuum, unsolvated NaB<sub>3</sub>H<sub>8</sub> was obtained (0.24 g, 76%). NaB<sub>3</sub>H<sub>8</sub>: <sup>11</sup>B NMR (193 MHz, CD<sub>3</sub>CN): δ -30.0 (*nonet*, *J* = 33 Hz) ppm. <sup>1</sup>H NMR (600 MHz, CD<sub>3</sub>CN): δ 0.14 (*decet*, *J* = 33 Hz) ppm (Figs. S7 and S8).

#### 1.5. Reaction of THF·B<sub>3</sub>H<sub>7</sub> with LiBH<sub>4</sub>.

In a 50 mL flask, LiBH<sub>4</sub> (0.11 g, 5 mmol) was added and then THF·B<sub>3</sub>H<sub>7</sub> (30 mL, 5 mmol) was injected. The reaction was stirred 1 h at room temperature, B<sub>3</sub>H<sub>7</sub> was completely consumed and the formed B<sub>3</sub>H<sub>8</sub><sup>-</sup> and BH<sub>3</sub> signals, and a small amount of BH<sub>4</sub><sup>-</sup> signal were observed in <sup>11</sup>B NMR (Fig. S9). The THF solvent and the formed THF·BH<sub>3</sub> solution was removed under dynamic vacuum to produce a sticky solid, into which 20 mL of THF was added and then 20 μL of H<sub>2</sub>O was injected. After stirring 10 min, a small amount of precipitate was formed which was filtered. Removal of THF from the filtrate produced Li(THF)<sub>1.5</sub>B<sub>3</sub>H<sub>8</sub> as a clear oily product (0.61 g, 79%). <sup>11</sup>B NMR (128 MHz, CD<sub>3</sub>CN): δ -31.2 (*nonet*, *J* = 33 Hz) ppm. <sup>1</sup>H NMR (600 MHz, CD<sub>3</sub>CN): δ 3.64 (*m*, 4α-H of THF), 1.80 (*m*, 4β-H of THF), 0.14 (*decet*, *J* = 33 Hz, 8H of B<sub>3</sub>H<sub>8</sub>) ppm (Figs. S10 and S11).

#### 1.6. Reaction of THF·B<sub>3</sub>H<sub>7</sub> with NaBH<sub>4</sub>.

In a 50 mL flask, NaBH<sub>4</sub> (0.19 g, 5 mmol) was added and then THF·B<sub>3</sub>H<sub>7</sub> (30 mL, 5 mmol) was injected. The reaction was stirred for 12 h at room temperature, B<sub>3</sub>H<sub>7</sub> was completely consumed and the formed B<sub>3</sub>H<sub>8</sub><sup>-</sup> and BH<sub>3</sub> signals, and a small amount of BH<sub>4</sub><sup>-</sup> signal were observed in the <sup>11</sup>B NMR (Fig. S12). The formed THF·BH<sub>3</sub> and the THF solvent were removed under dynamic vacuum to produce a sticky solid, into which 20 mL of THF was added and then 30 μL H<sub>2</sub>O was injected. After stirring 50 min, a small amount of precipitate was formed which was filtered. Removal of THF from the filtrate produced an oily product. The oily product was dissolved in 20 mL CH<sub>2</sub>Cl<sub>2</sub> to convert into

suspension under stirring. After filtration, the solid was dried under dynamic vacuum to produce unsolvated  $\text{NaB}_3\text{H}_8$  (0.23 g, 73%).

### 1.7. Synthesis of $\text{NH}_4\text{B}_3\text{H}_8$ .

The prepared unsolvated  $\text{KB}_3\text{H}_8$  (0.80 g, 10 mmol) and  $\text{NH}_4\text{Cl}$  (0.54 g, 10 mmol) were added into a 50 mL Schlenk flask and then 30 mL liquid ammonia was condensed at  $-78^\circ\text{C}$ . After 50 min stirring, ammonia was removed and the flask was warmed to room temperature. The prepared  $\text{NH}_4\text{B}_3\text{H}_8$  was extracted using dry THF. The KCl residue was washed with THF ( $3 \times 10$  mL), which was confirmed by XRD (Fig. S13). The combined filtrate and the wash solution was then evaporated to produce a white solid, which was dried under dynamic vacuum to give the  $\text{NH}_4\text{B}_3\text{H}_8$  white powder (0.57 g, 96%).  $^{11}\text{B}$  NMR (193  $\text{MHz}$ ,  $\text{CD}_3\text{CN}$ ):  $\delta$  -30.6 (*nonet*,  $J = 33$  Hz) ppm (Fig. S14).  $^1\text{H}$  NMR (400  $\text{MHz}$ ,  $\text{CD}_3\text{CN}$ ):  $\delta$  5.85 (*s*, 4H of  $\text{NH}_4$ ), 0.14 (*decet*,  $J = 33$  Hz, 8H of  $\text{B}_3\text{H}_8$ ) ppm (Fig. S15).

### 1.8. Synthesis of $\text{NBu}_4\text{B}_3\text{H}_8$ .

The prepared unsolvated  $\text{KB}_3\text{H}_8$  (0.80 g, 10 mmol) and  $\text{NBu}_4\text{Br}$  (3.22 g, 10 mmol) were added into a 50 mL flask and then 30 mL of THF was condensed. After the reaction mixture stirring for 6 hours at room temperature, the reaction solution was filtered and the KBr frit was washed with THF ( $3 \times 10$  mL), which was confirmed by XRD (Fig. S16). The filtrate was evaporated to produce a sticky solid, which was washed with diethyl ether ( $3 \times 30$  mL) and dried under vacuum to give a free-flowing  $\text{NBu}_4\text{B}_3\text{H}_8$  white powder (2.69 g, 95%).  $^{11}\text{B}$  NMR (193  $\text{MHz}$ ,  $\text{CD}_3\text{CN}$ ):  $\delta$  -31.4 (*nonet*,  $J = 33$  Hz) ppm (Fig. S17).  $^1\text{H}$  NMR (600  $\text{MHz}$ ,  $\text{CD}_3\text{CN}$ ):  $\delta$  3.09 (*t*, 2H of  $\text{CH}_2$ ), 1.58 (*m*, 2H of  $\text{CH}_2$ ), 1.35 (*m*, 2H of  $\text{CH}_2$ ), 0.97 (*t*,  $J = 7$  Hz, 3H of  $\text{CH}_3$ ), 0.14 (*decet*,  $J = 33$  Hz, 8H of  $\text{B}_3\text{H}_8$ ) ppm (Fig. S18).

## 2. Supporting Results:

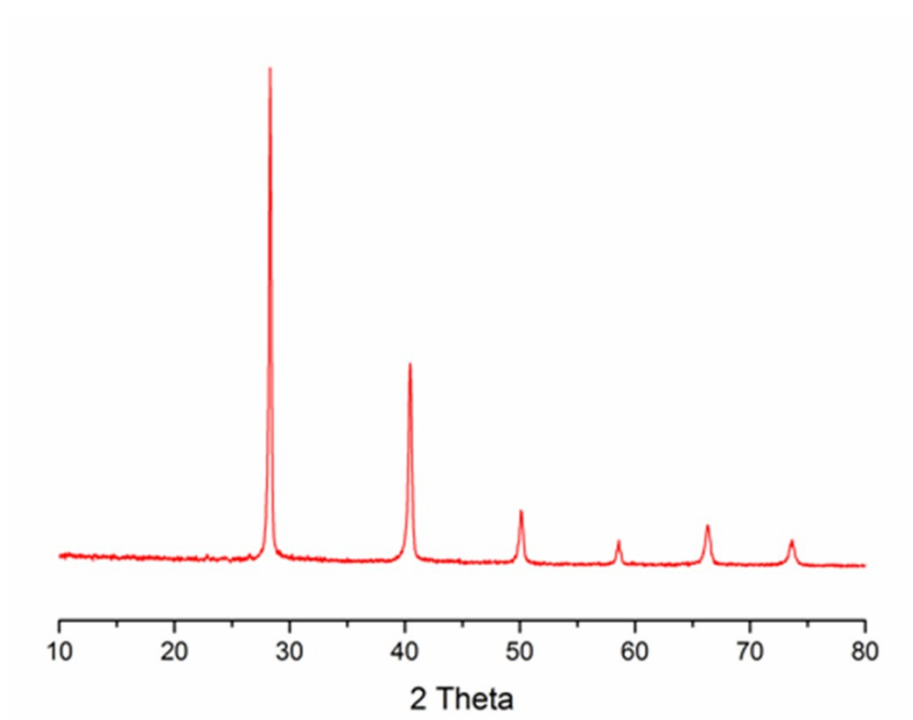

**Fig. S1** X-ray powder diffraction data of KCl.

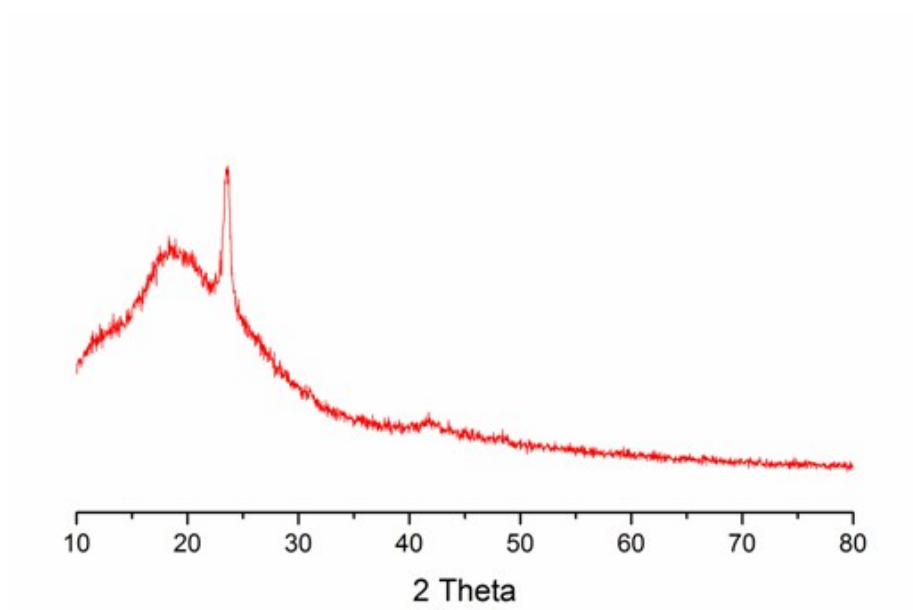

**Fig. S2** X-ray powder diffraction data of the formed  $[\text{NH}_2\text{BH}_2]_n$ .

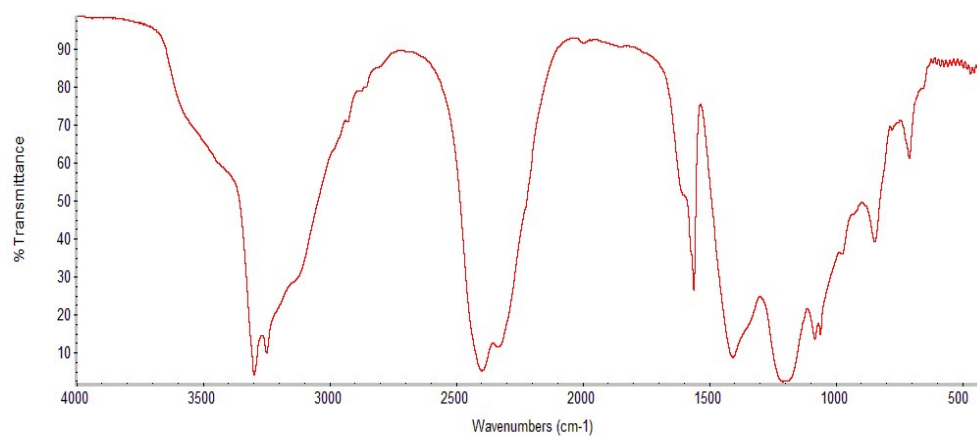

**Fig. S3** IR spectrum of the formed  $[\text{NH}_2\text{BH}_2]_n$ .

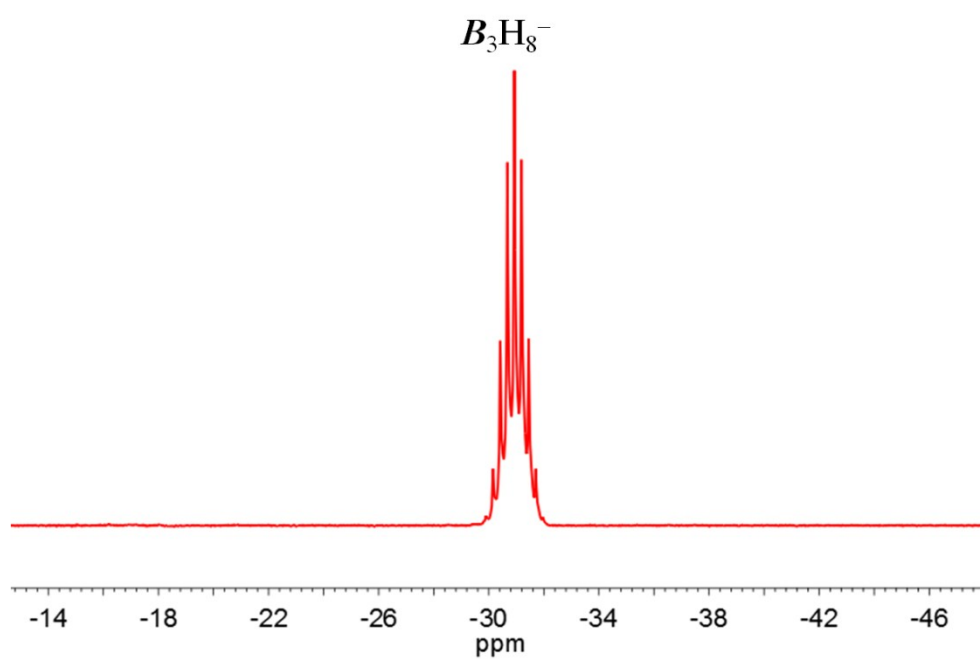

**Fig. S4**  $^{11}\text{B}$  NMR spectrum of the prepared  $\text{Li}(\text{THF})_{1.5}\text{B}_3\text{H}_8$  in  $\text{CD}_3\text{CN}$ .

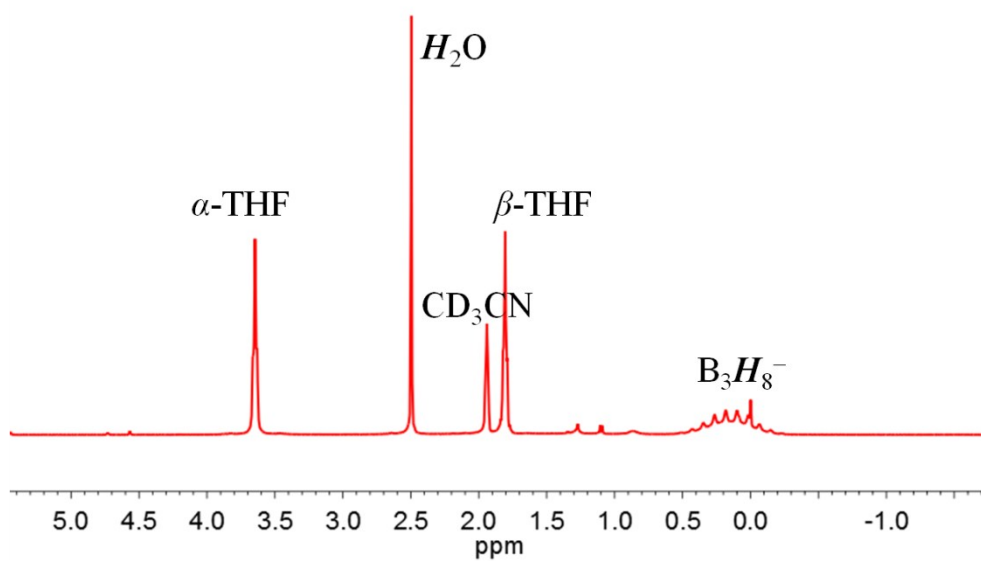

**Fig. S5**  $^1\text{H}$  spectrum of the prepared  $\text{Li}(\text{THF})_{1.5}\text{B}_3\text{H}_8$  in  $\text{CD}_3\text{CN}$ .

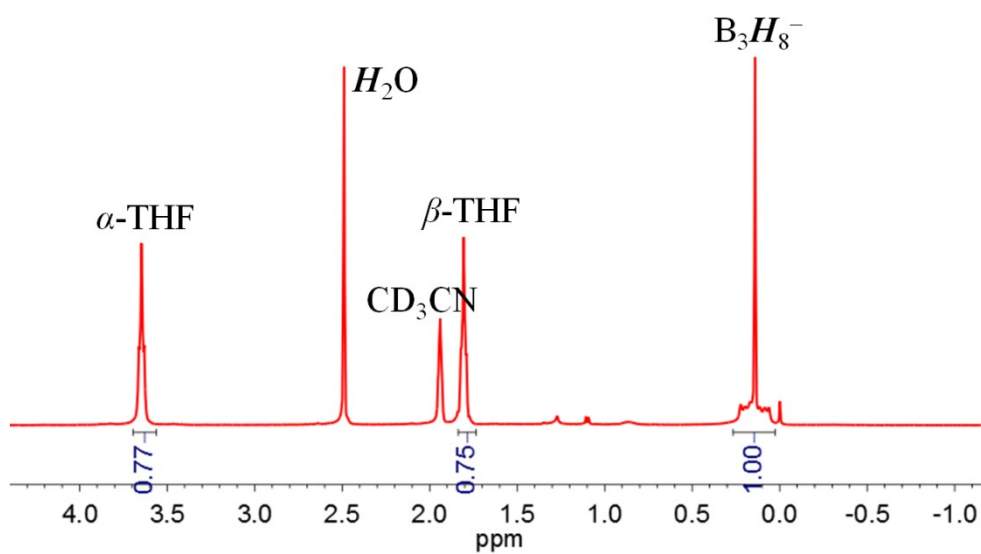

**Fig. S6**  $^1\text{H}\{^{11}\text{B}\}$  spectrum of the prepared  $\text{Li}(\text{THF})_{1.5}\text{B}_3\text{H}_8$  in  $\text{CD}_3\text{CN}$ .

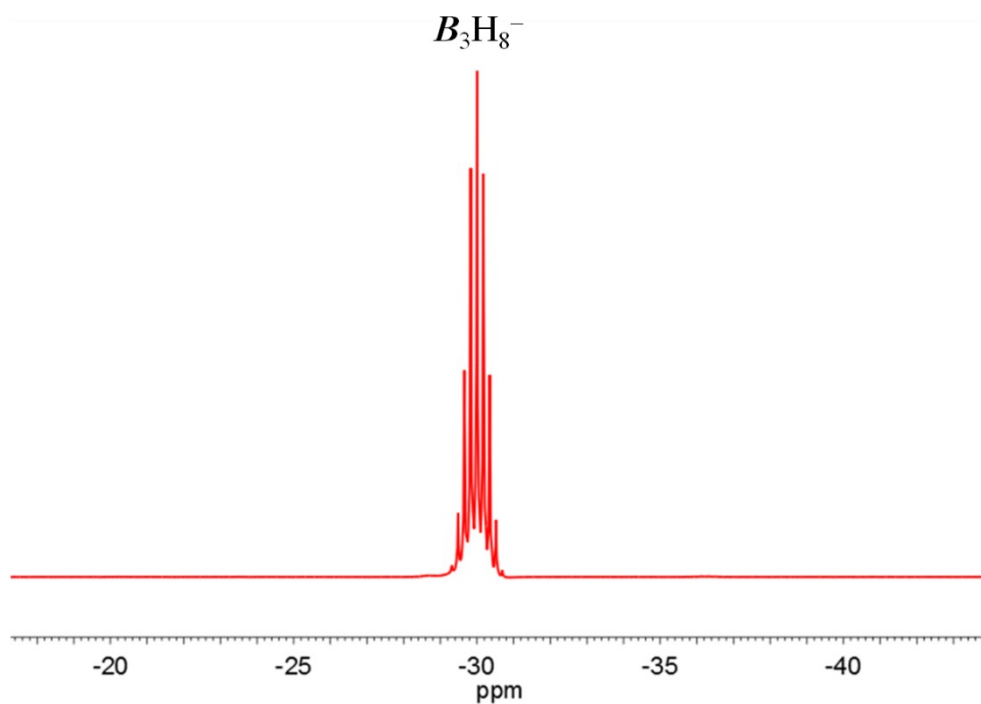

**Fig. S7**  $^{11}\text{B}$  NMR spectrum of the prepared unsolvated  $\text{NaB}_3\text{H}_8$  in  $\text{CD}_3\text{CN}$ .

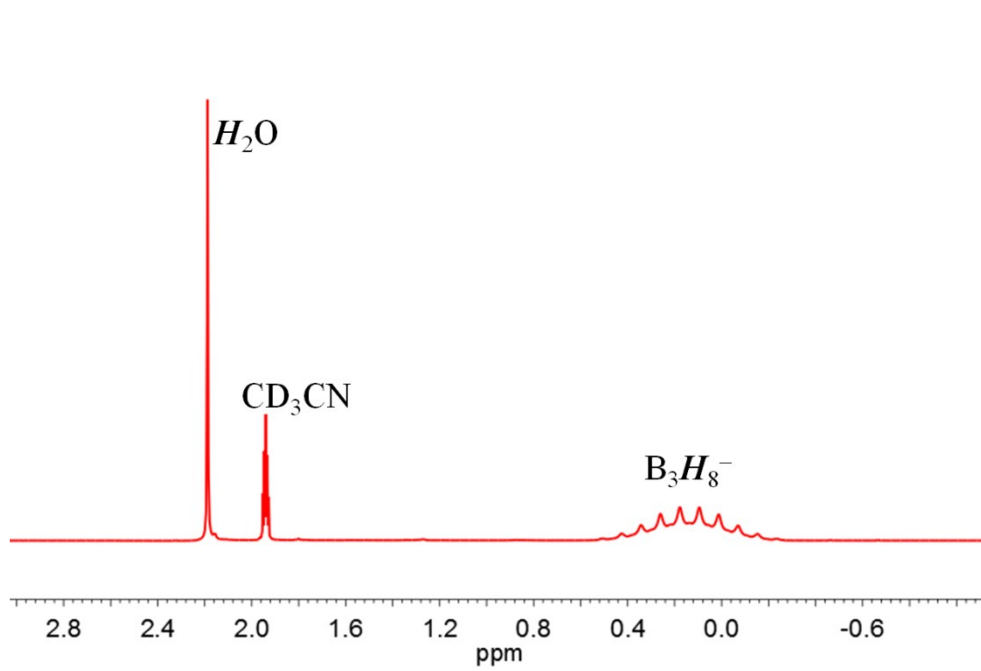

**Fig. S8**  $^1\text{H}$  NMR spectrum of the prepared unsolvated  $\text{NaB}_3\text{H}_8$  in  $\text{CD}_3\text{CN}$ .

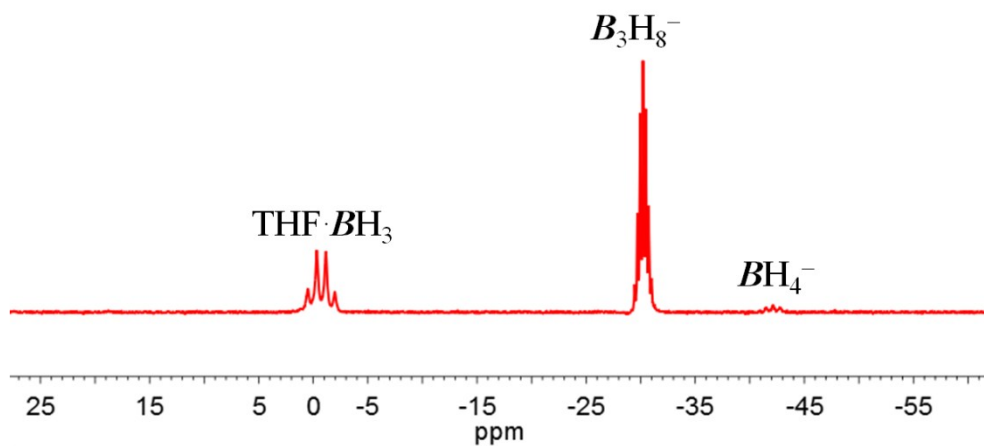

**Fig. S9**  $^{11}\text{B}$  NMR spectrum of the reaction solution of  $\text{LiBH}_4$  and  $\text{THF}\cdot\text{B}_3\text{H}_7$  in THF at room temperature.

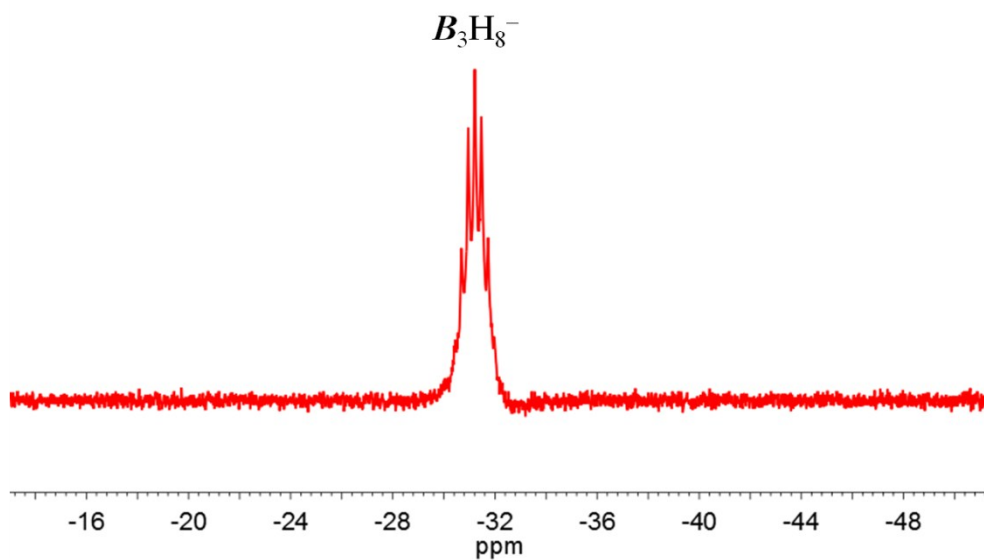

**Fig. S10**  $^{11}\text{B}$  NMR spectrum of the prepared  $\text{Li}(\text{THF})_{1.5}\text{B}_3\text{H}_8$  in  $\text{CD}_3\text{CN}$ .

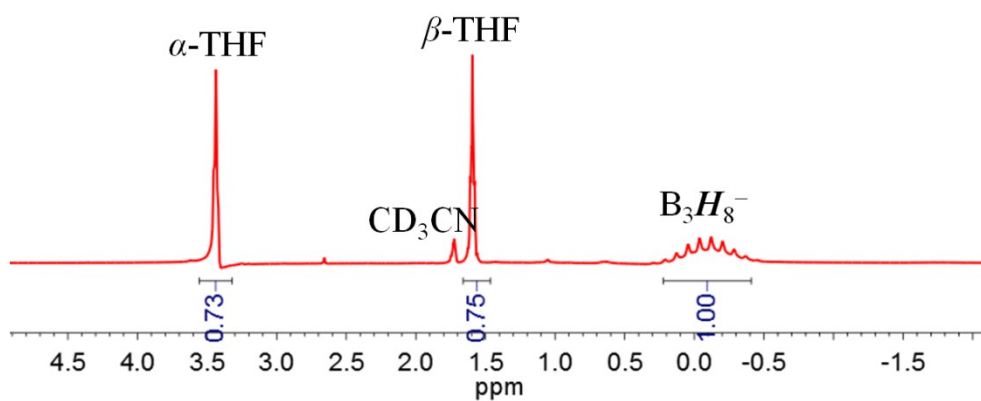

**Fig. S11**  $^1\text{H}$  NMR spectrum of the prepared  $\text{Li}(\text{THF})_{1.5}\text{B}_3\text{H}_8$  in  $\text{CD}_3\text{CN}$ .

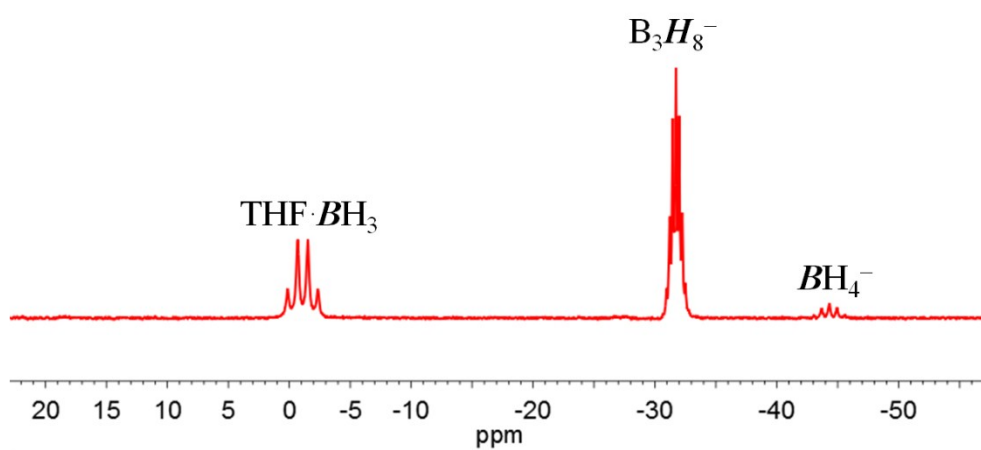

**Fig. S12**  $^{11}\text{B}$  NMR spectrum of the reaction solution of  $\text{NaBH}_4$  and  $\text{THF} \cdot \text{B}_3\text{H}_7$  in THF at room temperature.

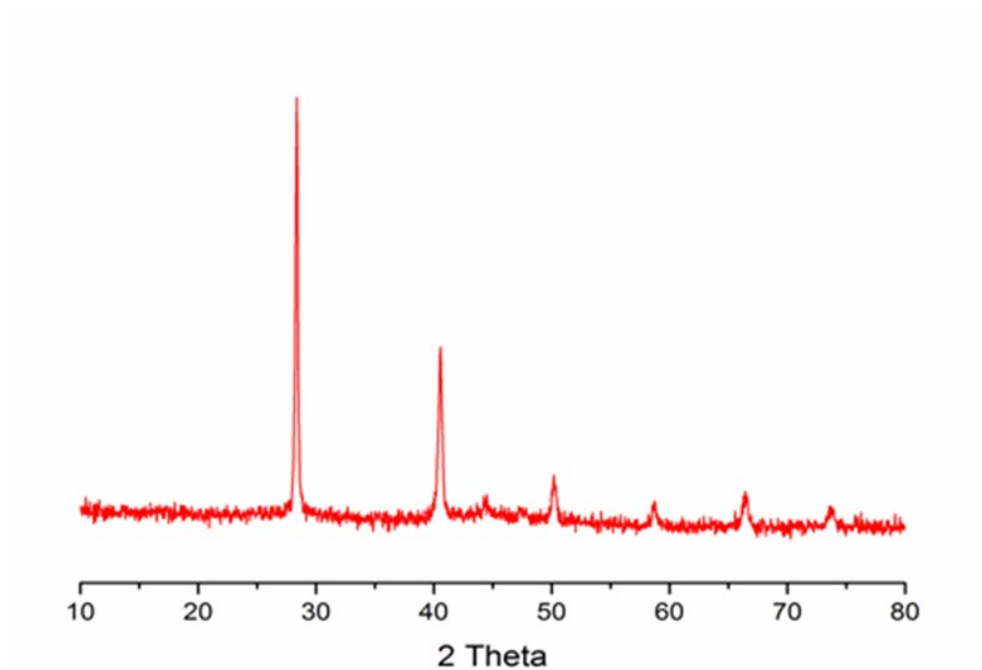

**Fig. S13** X-ray powder diffraction data of the formed KCl.

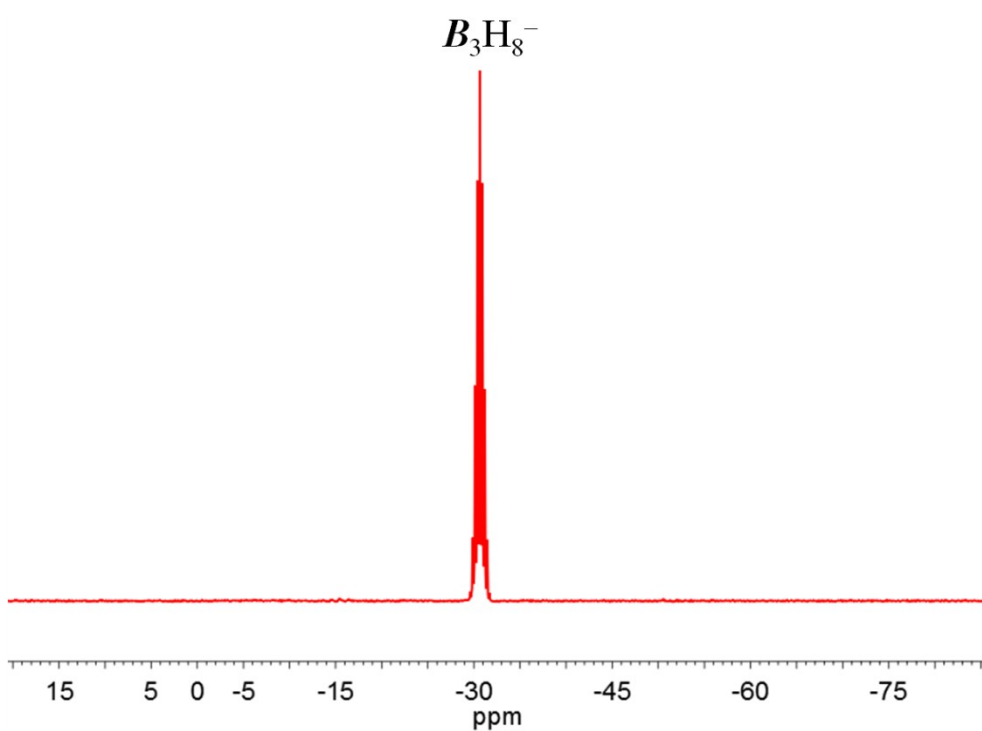

**Fig. S14**  $^{11}\text{B}$  NMR spectrum of the prepared  $\text{NH}_4\text{B}_3\text{H}_8$  in  $\text{CD}_3\text{CN}$ .

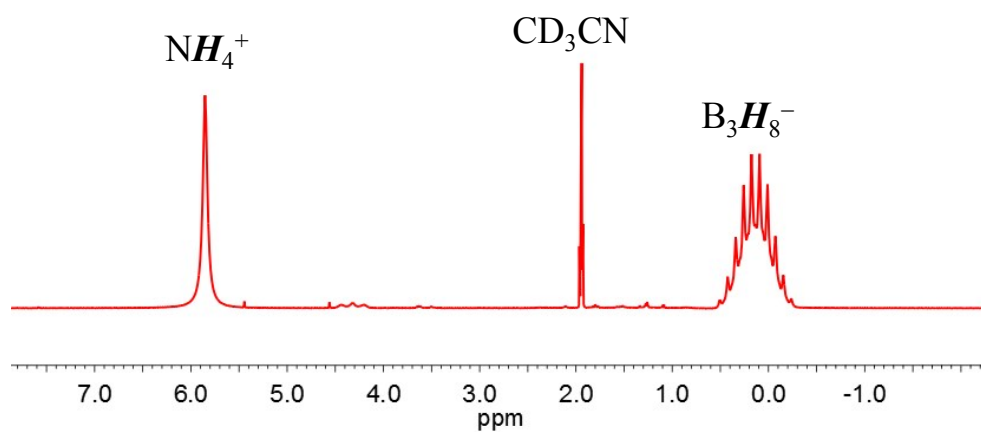

**Fig. S15**  $^1\text{H}$  NMR spectrum of the prepared  $\text{NH}_4\text{B}_3\text{H}_8$  in  $\text{CD}_3\text{CN}$ .

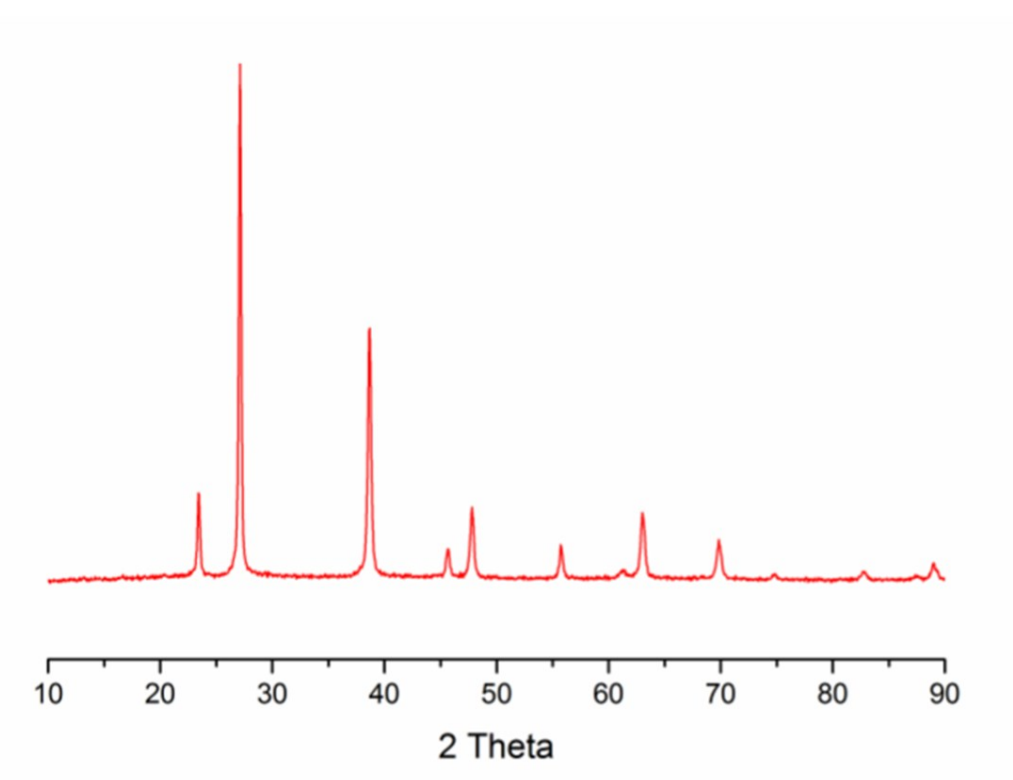

**Fig. S16** X-ray powder diffraction data of the formed KBr.

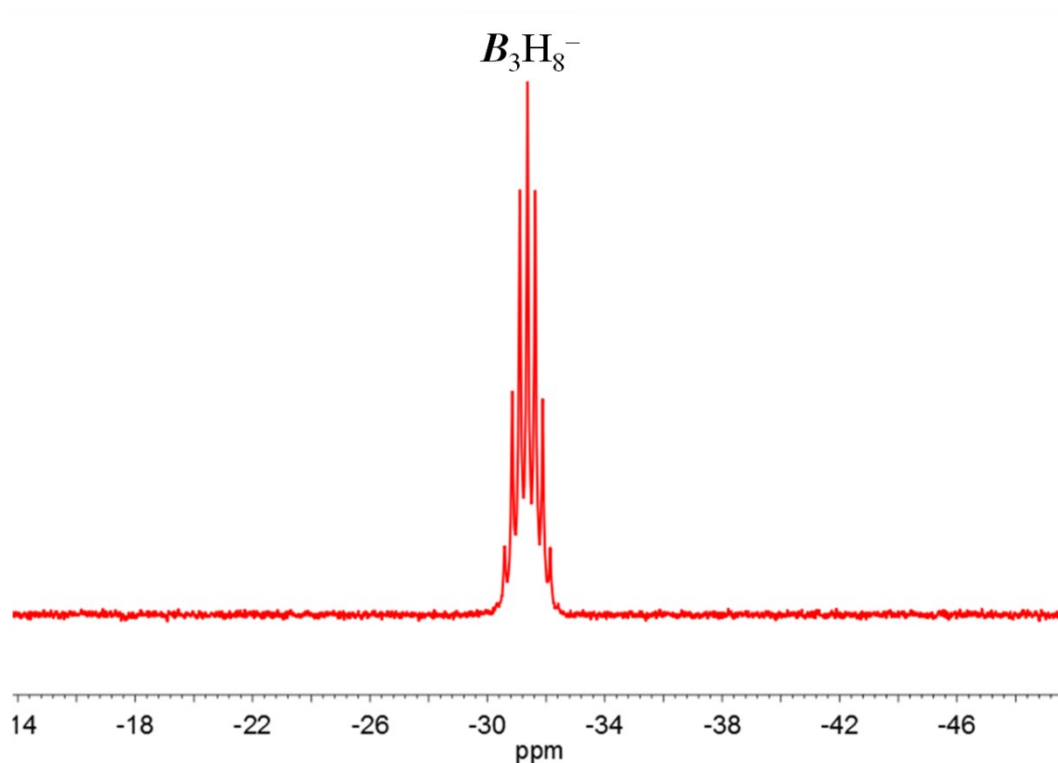

**Fig. S17**  $^{11}\text{B}$  NMR spectrum of the prepared  $\text{NBu}_4\text{B}_3\text{H}_8$  in  $\text{CD}_3\text{CN}$ .

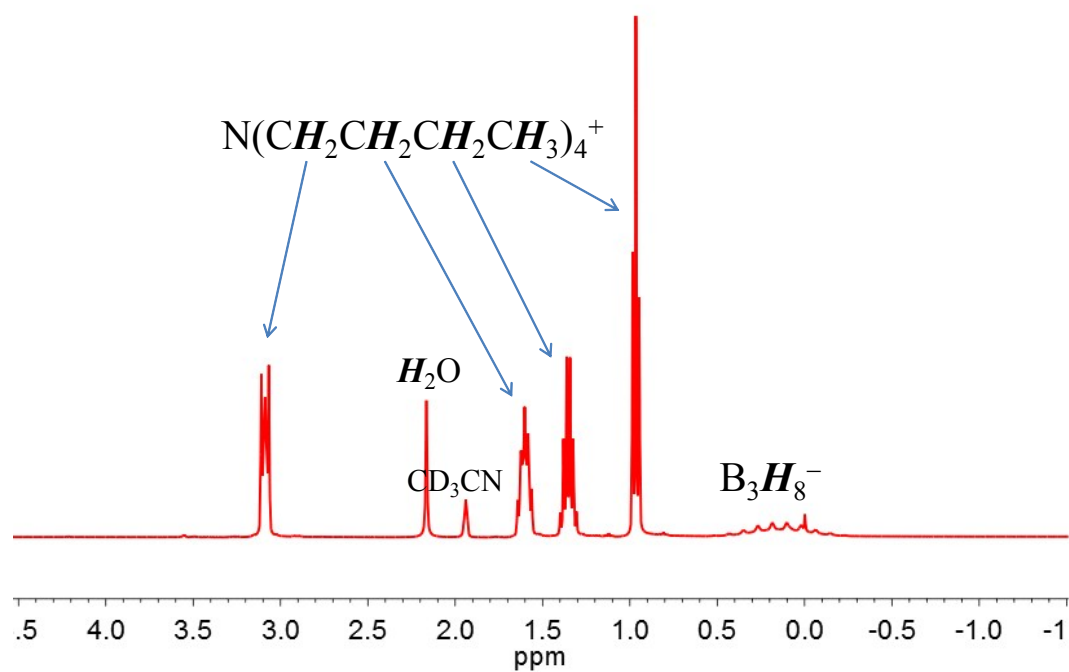

**Fig. S18**  $^1\text{H}$  NMR spectrum of the prepared  $\text{NBu}_4\text{B}_3\text{H}_8$  in  $\text{CD}_3\text{CN}$ .

### 3. Supporting Scheme:

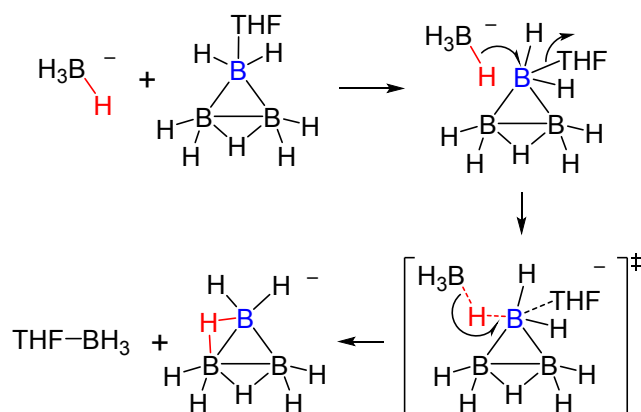

**Scheme S1** The reaction of  $\text{MBH}_4$  ( $\text{M} = \text{Li}, \text{Na}$ ) with  $\text{THF} \cdot \text{B}_3\text{H}_7$ .

### 4. References:

S1. (a) Y. S. Chua, P. Chen, G. Wu, Z. Xiong, *Chem. Commun.*, 2011, **47**, 5116-5129; (b) W. Xu, H. Fan, G. Wu and P. Chen, *New J. Chem.*, 2012, **36**, 1496-1501; (c) H. V. K. Diyabalanage, T. Nakagawa, R. P. Shrestha, T. A. Semelsberger, B. L. Davis, B. L. Scott, A. K. Burrell, W. I. F. David, K. R. Ryan, M. O. Jones and P. P. Edwards, *J. Am. Chem. Soc.*, 2010, **132**, 11836-11837; (d) Z. Xiong, C. K. Yong, G. Wu, P. Chen, W. Shaw, A. Karkamkar, T. Autrey, M. O. Jones, S. R. Johnson, P. P. Edwards, W. I. F. David, *Nat. Mater.*, 2008, **7**, 138-141; (e) Z. Xiong, G. Wu, Y. S. Chua, J. Hu, T. He, W. Xu and P. Chen, *Energy Environ. Sci.*, 2008, **1**, 360-363.
